# Who gets lost and why: A representative cross-sectional survey on sociodemographic and vestibular determinants of wayfinding strategies

Susanne Ulrich<sup>1</sup>, Eva Grill<sup>1,2\*</sup>, Virginia L. Flanagan<sup>2</sup>

<sup>1</sup> Institute for Medical Information Processing, Biometrics and Epidemiology, LMU Munich, Marchioninistraße 17, 81377 Munich, Germany

<sup>2</sup> German Center for Vertigo and Balance Disorders, LMU Munich, Marchioninistraße 15, 81377 Munich, Germany

\*corresponding author: [vflanagin@lrz.uni-muenchen.de](mailto:vflanagin@lrz.uni-muenchen.de) (VLF)

**Short title:** Wayfinding and the vestibular system

**Keywords:** wayfinding ability, navigation, cognitive map, vertigo, dizziness, representative sample, German

*Acknowledgements:* This project was supported by funds from the German Federal Ministry of Education and Research under the Grant Code 01EO1401. The authors bear full responsibility for the content of this publication.

*Competing interests:* Authors declare no conflicts of interest

**Word Counts:**

Abstract: 298 words

Main Text: 5242 (including Figure 1 and Table 1)

Number of Figures/Tables: 1 figure, 3 tables

## 1 **Abstract**

2 When we think of our family and friends, we probably know someone who is good at finding  
3 their way and someone else that easily get lost. We still know little about the biological and  
4 environmental factors that influence our navigational ability. Here, we investigated the  
5 frequency and sociodemographic determinants of wayfinding and their association with  
6 vestibular function in a representative cross-sectional sample (N = 783) of the adult German-  
7 speaking population. Wayfinding was assessed using the Wayfinding Strategy Scale, a self-  
8 report scale that produces two scores for each participant representing to what degree they rely  
9 on route-based or orientation (map-based) strategies. We were interested in the following  
10 research questions: (1) the frequency and determinants of wayfinding strategies in a population-  
11 based representative sample, (2) the relationship between vestibular function and strategy  
12 choice and (3) how sociodemographic factors influence general wayfinding ability as measured  
13 using a combined score from both strategy scores. Our linear regression models showed that  
14 being male, having a higher education, higher age and lower regional urbanization increased  
15 orientation strategy scores. Vertigo/dizziness reduced the scores of both the orientation and the  
16 route strategies. Using a novel approach, we grouped participants by their combined strategy  
17 scores in a multinomial regression model, to see whether individuals prefer one strategy over  
18 the other. The majority of individuals reported using either both or no strategy, instead of  
19 preferring one strategy over the other. Young age and reduced vestibular function were  
20 indicative of using no strategy. In summary, wayfinding ability depends on both biological and  
21 environmental factors; all sociodemographic factors except income. Over a third of the  
22 population, predominantly under the age of 35, does not successfully use either strategy. This  
23 represents a change in our wayfinding skills, which may result from the technological advances  
24 in navigational aids over the last few decades.

25

## 26 Introduction

27 Wayfinding; the ability to find one's way in an unfamiliar environment, has an outstanding  
28 place among our cultural skills. The ability to find one's way in a complex environment is no  
29 trivial feat. It is therefore not surprising that we find a high degree of variability in individuals'  
30 ability and the strategies used and declines in normal aging [1], in neurodegenerative disease  
31 [2] and with vestibular dysfunction [3,4]. These strategies have been broadly defined as route  
32 strategies and orientation strategies [5,6]. The difference between these two strategies is  
33 demonstrated in Figure 1.

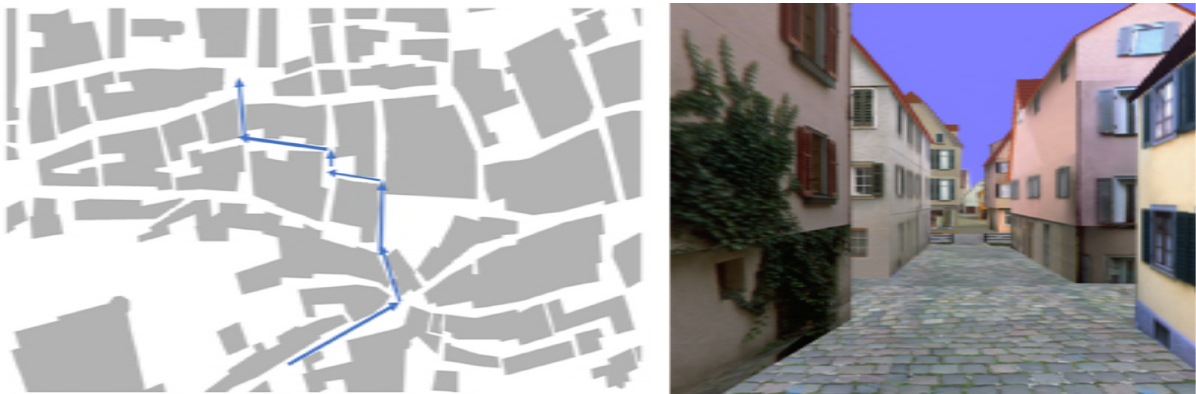

34  
35 **Figure 1. Illustration of the two main wayfinding strategy types. Left: the orientation strategy**, in  
36 which individuals use spatial relations and global reference points such as the sun or cardinal directions to  
37 navigate. Individuals that use this strategy often report having a 2D map of the environment in their head.  
38 An example orientation strategy statement: *“I keep track of the direction (north, south, east or west) in*  
39 *which I was going”*. **Right: the route strategy**, where individuals make navigation decisions based upon  
40 information in their immediate environment from an egocentric viewpoint. They may know to turn left at  
41 the building with ivy on the wall. An example route strategy statement: *“Before starting, I ask for*  
42 *directions telling me whether to turn right or left at particular streets or landmarks”*. Images from Virtual  
43 Tuebingen, based on [7,8]

44 Route strategies, also called “path” or “response-based” strategies involve wayfinding by  
45 learning a route from a starting point to a destination as a sequence of instructions based on  
46 local orientation points or landmarks cues [1,2,5]. The route strategy requires only an egocentric  
47 frame of reference or a path view of the environment [1], in other words the viewpoint that is

48 always present when we navigate through the environment. Knowledge from this path can then  
49 be used to assemble the positions into a network of internal representations of landmarks, routes  
50 and other positional information. This network of information; often described as a “cognitive  
51 map” [6,9] of the environment, provides us with survey knowledge, i.e. an integrated  
52 understanding of the spatial layout of the environment, including relative distances between  
53 objects. The orientation strategy makes use of this conglomerate of information; global  
54 reference points, e.g. the position of the sun, distances or the cardinal directions [5,10,11] are  
55 used to navigate the environment. This strategy is thought to rely on an allocentric frame of  
56 reference, a bird’s eye perspective or a map-like internal representation of the environment,  
57 representations that are independent of one’s current position and orientation in space [9].

58 Both orientation and route strategies have their advantages and disadvantages. The orientation  
59 strategy, when used correctly, allows individuals to take detours or find the correct path when  
60 approaching a known intersection from another direction [9,12]. The route strategy is  
61 computationally less expensive and therefore likely faster, but individuals are not flexible in  
62 finding their way [13]. This suggests that persons that use the orientation strategy have superior  
63 wayfinding ability, although individuals may be the most proficient if they are able to combine  
64 techniques from both strategies [14].

65 Neurological disorders can selectively affect wayfinding strategies. Disorientation and  
66 impaired wayfinding are often the first signs of senile dementia and Alzheimer’s disease [2,4].  
67 The hippocampus and surrounding medial temporal lobe (MTL) are some of the first brain  
68 regions affected by Alzheimer’s disease and dementia [15]. The MTL plays a key role in  
69 memory, in particular spatial memory. It is thought to provide important computations for map-  
70 based or allocentric navigation [16,17]; computations specific to the orientation strategy.  
71 Vestibular dysfunction, the partial or complete loss of function in the vestibular organ or central  
72 pathways, is a less well known, but widespread neurological disorder. In an ongoing cross-  
73 sectional survey in the United States, vestibular dysfunction, measured by the presence of

74 vertigo/dizziness, was present in over half of the individuals over the age of 40 [18]. Vestibular  
75 dysfunction also leads to a decrease in hippocampal size and an associated decrease in  
76 navigational ability [3,19,20]. This suggests that Alzheimer's disease, dementia and vestibular  
77 dysfunction may specifically impair the ability for persons to use the orientation strategy.  
78 Alternatively, recent evidence suggests that vestibular dysfunction strongly influences  
79 cognitive function and navigation in general [3,18,21,22]. It was associated with a decrease in  
80 cognitive function equivalent to adding five years of age [18], suggesting that vestibular  
81 dysfunction may affect both navigation strategies.

82 Although we have started to understand the factors that affect strategy use in individuals, there  
83 is also much we do not know. One consistent factor that influences wayfinding is gender. Men  
84 appear to consistently prefer orientation strategies and generally have superior performance  
85 [5,10,23]. Unfortunately, most of the research on wayfinding has either come from small  
86 populations [11] or samples with a restricted range of sociodemographic and biological  
87 characteristics, primarily college undergraduates [5,10]. We therefore conducted the current  
88 study in order to examine the sociodemographic and vestibular components of wayfinding  
89 ability in a representative cross-sectional sample of the German population. The three  
90 objectives of the study were (1) to investigate the frequency and determinants of wayfinding  
91 strategies in a population-based representative sample (2) to test whether vestibular function  
92 affects only the orientation strategy or both wayfinding strategies and (3) to examine the  
93 frequency of combined scores in the population and how sociodemographic factors influence  
94 general wayfinding ability as measured using both strategy scores.

## 95 **Methods**

### 96 **Sample**

97 The data were collected through a computer-assisted telephone interview (CATI-interview)  
98 with trained interviewer, as part of an omnibus survey performed by the market research Kantar

99 Health (<http://www.kantarhealth.com/>). To collect a cross-sectional representative sample from  
100 the German-speaking population, the Infratest telephone master sample (ITMS) was designed  
101 according to the consortium of German market research institutes (Arbeitsgemeinschaft  
102 deutscher Marktforschungsinstitute, ADM-Design) [24]. Participants were recruited if they had  
103 a minimum age of 18 and a landline; constituting 90% of all private households in Germany.  
104 Participants gave oral informed consent before the questionnaire was administered, in  
105 accordance with the Declaration of Helsinki. The telephone numbers were based on the official  
106 German telephone registry, stratified according to administrative districts and community sizes.  
107 Additional numbers were generated by random selection of the last two digits of telephone  
108 numbers. Finally, telephone numbers were randomly selected at the community level. This  
109 three-stage sampling design is thought to ensure an unbiased sample selection that excludes  
110 clustering effects and allows a random selection of defined targets. For example, the lifetime  
111 prevalence of 25-30% expected for vertigo/dizziness was estimated with a precision of 2.7%  
112 from a sample size of 1,000 participants using the same sampling design [25,26]. Data  
113 collection ran December 11<sup>th</sup>, 12<sup>th</sup> and 16<sup>th</sup> 2015.

## 114 **Measures**

115 The Wayfinding Scale [5], was used to determine relevant predictors of wayfinding strategy  
116 types and wayfinding ability. The original scale comprises a total of 14 items; nine items for  
117 the orientation strategy, with a maximum score of 45, and five items for the route strategy, with  
118 a maximum score of 25. For every item on the original scale, there is a 5-point-likert answering  
119 scale, where 1 means *not at all typical for me* and 5 *very typical for me*. For the purpose of this  
120 study we deleted one item concerning orientation strategy (“I refer to a published road map  
121 when I drive”) because of the decreased use of written maps and increase use of mobile devices  
122 for navigation. Additionally, an item from 2002 modified International Wayfinding Scale [10]  
123 (“I found maps of the building or complex, with an arrow pointing to my present location, to  
124 be very helpful”) replaced one item concerning the route strategy (“Before starting, I ask for a

125 hand-drawn map of the area”) for similar reasons. Consequently, the Wayfinding Scale used  
126 had 13 items instead of 14 items and a maximum attainable score of 40 instead of 45 for  
127 orientation strategy. The questions used in our Wayfinding Scale can be found in the supporting  
128 information (S1 File). For further analysis, the individual sum scores from each strategy were  
129 scaled to 100 to compare the individual wayfinding ability among the two strategies and to  
130 determine which strategy was preferred.

131 The original scale was adapted for German by multiple iterations of a translation-retranslation-  
132 procedure by a team of German and English native-speakers [27]. Because the Wayfinding  
133 Scale has been used several times [5,10,28] in different countries [29] and associated with real-  
134 world navigational tasks [11], it is regarded as valid and transferrable for the current study.

135 Sociodemographic characteristics included age, sex, education, household income, and a  
136 nationally defined regional urbanization metric. Age was stratified into four brackets (18-35,  
137 36-55, 56-70, 71-96). The division at age of 55 was near to the median age and allowed to  
138 include the thesis of hormonal regulation [30,31]. Education was measured by the highest level  
139 of academic achievement. Level of education was then grouped according to the International  
140 Standard Classification of Education (ISCED 97) [32,33] into primary/lower secondary,  
141 secondary/non-tertiary, upper secondary and tertiary education. The 15 individuals still in  
142 school were grouped with the participants who were in secondary, non-tertiary education.  
143 Education and household net income were stratified into quartiles. Two items assessed vertigo  
144 and balance: “Did you experience moderate or severe dizziness or vertigo during the last 12  
145 months? (rotational vertigo, staggering vertigo, imbalance) and “How good is your sense of  
146 balance compared to other people your age?”. The town sizes are shown according to BIK  
147 regions, which is a national regional classification system established by the market research  
148 institute BIK Aschpurwis + Behrens GmbH, comparable to the Metropolitan Statistical Areas  
149 (MSA) in the USA [24]. BIK systematics better express the structural features of today’s city  
150 regions than the Boustedt method (or the current political town size classes in the new federal

151 states). Existing municipalities in Germany are defined as BIK regions according to the number  
152 of inhabitants of a catchment area and the size and intensity of commuter links [34,35]. The  
153 BIK-regions can be seen as a measure of regional urbanization, classified by the number of  
154 inhabitants per region.

## 155 **Statistical analysis**

156 Categorical variables were summarized by frequencies and percentages. Continuous variables  
157 were summarized by mean and standard deviation.

158 To adjust for the effect of over- or under-representation of specific person groups, e.g. the over-  
159 representation of middle aged and upper-/middle-class participants, the sample was weighted  
160 by federal state, regional division system, age, gender, occupation, education and the number  
161 of individuals living in a household. Thus, each target person was fitted with an individual  
162 weighting coefficient. The weighting coefficients summed to the sample size, while the mean  
163 value of the weights across the sample was equal to one. Individual weightings ranged from  
164 0.27 to 12.69. A weighting of less than one reduced the effect of an over-represented person  
165 and a weight greater than one was meant to adjust the influence of participants that were  
166 underrepresented in the sample [32,36,37]. If not stated otherwise, we present the weighted  
167 results.

168 To investigate the determinants of wayfinding, we applied separate linear models for both  
169 orientation and route scales as outcomes using the Wayfinding Scale score values (S2 Table).  
170 Regression diagnostics for all models included tests for multicollinearity using the variance-  
171 inflation-factor and residual-plots, Breusch-Pagan-Screening-Test for heteroscedasticity and  
172 Kolmogorov-Smirnov-test for normal distribution as well as further residual diagnostic like  
173 cook-distance for outliers [38–41]. Since regression diagnostic of the route scores indicated  
174 heteroscedasticity and a variance-stabilizing log-linear-transformation of the scores did not  
175 improve goodness-of-fit, regression analysis with heteroscedasticity-consistent standard errors



176 was used with a heteroscedasticity consistent covariance matrix (HCCM 0) based on the Huber-  
177 White-Eicker weighting procedure for standard errors. This method is the procedure of choice  
178 in this situation as the sample size was large enough ( $n > 250$ ), and because it allows for easy  
179 interpretation [42].

180 Using separate models for the route and the orientation strategy neglects the fact that the two  
181 scores come from the same individual. Some individuals may score high in both route and  
182 orientation strategies, allowing them to flexibly adapt their wayfinding strategy to meet the  
183 needs of the situation. Similarly, individuals may score low on both strategies, suggesting that  
184 they have a difficult time successfully wayfinding in any situation. To investigate the combined  
185 outcome, we categorized individuals into four distinct classes based on their medians of both  
186 strategies (76 points on route scale, 60 points on orientation scale). Because our sample is large  
187 and representative, the median cut-off values used here can be applied to other studies with  
188 smaller and less representative samples.

189 An individual that scored at least 76 points on the route scale, but below 60 points on the  
190 orientation scale was classified as a route strategist. An individual that scored 60 points or more  
191 on the orientation scale, but less than 76 points on the route scale was classified as an orientation  
192 strategist. An individual scoring at least 76 points on route scale and at least 60 points on  
193 orientation scale was categorized as a “flexible” strategist. A person that scored less than 76  
194 points on route scale and less than 60 on orientation was defined as an “undetermined” strategist.  
195 We then used this categorized outcome for a multinomial regression [41,43].

196 All data analysis was carried out using SPSS software (IBM SPSS Statistics for Windows,  
197 Version 23.0. Armonk, NY: IBM Corp) and the IBM R-Essentials [44] using R software,  
198 version 3.1.0 [45].

## 199 Results

200 One-thousand three participants, aged 18-96 agreed to participate in the survey. All participants  
 201 with missing values were excluded from the statistical analyses. The final sample included 783  
 202 participants; 52.7% were women and the mean age was 47.9 years (SD = 17.9). Prevalence of  
 203 vertigo/dizziness was 24.2%. Table 1 shows the sociodemographic characteristics of all  
 204 participants that were included in the regression analysis, separated by strategy. As described  
 205 in the Methods, all data is weighted according to the frequency of the current population.

**Table 1.** Scores for the orientation and route strategy from the Wayfinding Scale, stratified by each sociodemographic class, including vertigo and balance (n = 783). The outcome scores are scaled to 100 and individually weighted according to the frequency of the current population

| variables                               |                          | orientation strategy |      |         | route strategy |      |         |        |
|-----------------------------------------|--------------------------|----------------------|------|---------|----------------|------|---------|--------|
|                                         |                          | (%)                  | mean | std.dev | median         | mean | std.dev | median |
| total (n=783)                           |                          |                      | 60.5 | 18.7    | 60             | 72.1 | 19.4    | 76     |
| gender                                  | men                      | 47.3                 | 64.0 | 17.5    | 62.5           | 74.4 | 18.7    | 76     |
|                                         | women                    | 52.7                 | 57.3 | 19.3    | 55             | 70.1 | 19.8    | 76     |
| age in years, classes                   | 18-35                    | 28                   | 58.1 | 17.8    | 57.5           | 73.0 | 15.0    | 72     |
|                                         | 36-55                    | 37.1                 | 61.8 | 18.3    | 60             | 75.5 | 19.8    | 80     |
|                                         | 56-70                    | 20.4                 | 59.8 | 19.7    | 57.5           | 69.0 | 20.5    | 72     |
|                                         | 71-96                    | 14.5                 | 62.5 | 20.0    | 62.5           | 66.1 | 22.1    | 68     |
| education <sup>1</sup>                  | primary /lower secondary | 32.5                 | 60.7 | 18.1    | 60             | 73.2 | 18.4    | 76     |
|                                         | secondary, non-tertiary  | 36.7                 | 57.7 | 19.2    | 55             | 66.8 | 21.4    | 68     |
|                                         | upper secondary          | 12.3                 | 59.3 | 17.4    | 57.5           | 76.4 | 15.2    | 76     |
|                                         | tertiary                 | 18.5                 | 66.5 | 18.5    | 65             | 77.9 | 16.4    | 80     |
| net income in €, classes                | 500 up to 1,500          | 22.2                 | 59.6 | 17.8    | 60             | 68.5 | 20.9    | 76     |
|                                         | 1,500 up to 2,500        | 32.4                 | 58.8 | 17.7    | 57.5           | 70.6 | 19.5    | 72     |
|                                         | 2,500 up to 3,500 €      | 22.1                 | 62.2 | 20.4    | 60             | 75.0 | 17.3    | 80     |
|                                         | >3,500                   | 23.2                 | 62.1 | 19.2    | 60             | 74.9 | 18.9    | 80     |
| inhabitants per BIK-region <sup>2</sup> | >2,000 up to 50,000      | 22.4                 | 60.9 | 19.1    | 57.5           | 72.4 | 18.4    | 76     |
|                                         | 50,000 up to 100,000     | 10.8                 | 62.3 | 18.3    | 57.5           | 72.8 | 17.1    | 76     |
|                                         | 100,000 up to 500,000    | 29.7                 | 62.1 | 18.9    | 62.5           | 71.1 | 19.2    | 72     |
|                                         | 500,000 and more         | 37                   | 58.4 | 18.5    | 60             | 72.6 | 20.7    | 80     |
| sense of balance                        | worse                    | 8.5                  | 58.3 | 19.3    | 55             | 67.3 | 25.0    | 76     |
|                                         | equal                    | 56.7                 | 58.5 | 18.4    | 57.5           | 71.5 | 18.4    | 72     |
|                                         | better                   | 34.8                 | 64.3 | 18.7    | 65             | 74.3 | 19.1    | 80     |
| vertigo/dizziness                       | yes                      | 24.2                 | 55.2 | 17.7    | 52.5           | 67.3 | 20.7    | 68     |
|                                         | no                       | 75.8                 | 62.2 | 18.8    | 60             | 73.6 | 18.7    | 76     |

<sup>1</sup>Categorization of German academic achievement according to ISCED 1997: Primary education/lower secondary education=Volks-/Hauptschulabschluss, secondary education=German Realschulabschluss and further education without diploma "Abitur" as well as current students/pupils, upper secondary education=Abitur/(Fach)hochschulreife, tertiary education=diploma for university and higher degree

<sup>2</sup> BIK-regions=measure of regional urbanization and are classified by the number of inhabitants

## 206 **Individual wayfinding strategies**

207 Two linear regressions were performed to examine the effect of sociodemographic determinants  
208 and vestibular performance, on the orientation and the route strategy respectively. The results  
209 of each of these regressions are presented in Table 2.

210 ~~~~~ TABLE 2 ABOUT HERE (separate file) ~~~~~

211 In the orientation strategy gender differences across the entire population were in accordance  
212 with what has been seen in other studies with a more limited age and educational stratification.  
213 Men reported significantly higher orientation scores than women by almost 5 points. The  
214 influence of estrogen was examined by comparing postmenopausal women in both age  
215 categories above the age of 55 to younger women, with the expectation that women above 55  
216 years of age have less estrogen and therefore higher orientation scores. However, we found no  
217 evidence that post-menopausal women reported higher orientation scores than pre-menopausal  
218 women.

219 In contrast to our expectations, older participants scored higher on the orientation strategy than  
220 younger participants. A person aged 71 or older reported an orientation strategy score that was  
221 on average 7 points higher than someone under the age of 36. Educational level and regional  
222 urbanization influenced orientation strategy scores in opposite directions. Increasing  
223 educational achievement lead to significantly higher orientation scores. Participants residing in  
224 urban areas with over 500,000 inhabitants had significantly lower orientation scores than  
225 residents in areas with up to 50,000 inhabitants.

226 Our second objective involved understanding the relationship between wayfinding and  
227 vestibular function. Both measures of vestibular performance had significant effects on the  
228 orientation strategy. Persons with vertigo in the last 12 months had reduced orientation scores  
229 of over 6 points. Correspondingly, participants with a good sense of balance had significantly  
230 higher scores on the orientation strategy scale.

231 In accordance with previous research, the route strategy showed much less stratified effects  
232 than the orientation strategy. There was no significant effect of age or gender on route strategy  
233 scores. However, two interesting and significant effects were found that were also seen in the  
234 orientation strategy. First, participants with higher educational achievement also reported  
235 increased scores on the route strategy. Second, the presence of vertigo in the last 12 months  
236 was associated with a 5-point decrease in route strategy scores compared to participants without  
237 vertigo.

238 In summary, the relevant sociodemographic determinants for wayfinding proved to be gender,  
239 age, regional urbanization and education. Income was the only factor measured that did not  
240 significantly influence wayfinding scores.

## 241 **Combined wayfinding strategies**

242 The Wayfinding Strategy Scale provides two independent scores for each participant; one for  
243 the orientation strategy and one for the route strategy. If analyzed separately, as has always  
244 been done previously, these scores do not show combined effects across both strategies. Most  
245 studies agree, though, that superior wayfinding involves the ability to switch between different  
246 strategies for flexible and fast adaptation to the situation at hand [1]. We therefore chose a novel  
247 approach to analyze the Wayfinding Strategy Scale, taking advantage of our representative  
248 sample. We grouped our participants into four groups using a median split and examined the  
249 sociodemographic determinants of combined strategies using a multinomial regression model  
250 and including all predictors from the linear regression models. Interestingly, the majority of  
251 individuals reported using either both strategies or neither strategy, instead of preferring one  
252 strategy over the other: 1) 30.7% were **undetermined strategists** that scored below the median  
253 in both strategies, 2) 18.5% were **route strategists** that scored above the median only in the  
254 route strategy, 3) 15.5% were **orientation strategists** that only scored above the median in the  
255 orientation strategy, and 4) 35.3% were **flexible strategists** that scored above the median for

256 both strategies.

257 The multinomial model is highly complex with all possible combinations of differences  
258 between groups. However, the odds ratios provide a useful way of interpreting the results of the  
259 analysis. An odds ratio greater than 1 means that there is a positive effect of that  
260 sociodemographic factor grouping to use a specific strategy compared to the reference grouping  
261 and strategy, whereas less than 1 means there is a negative effect. The multinomial model  
262 confirmed the results from the linear regression concerning the orientation strategy vs. the route  
263 strategy and will therefore not be reported here (for the full model see S3 Table). Instead, we  
264 focused here on flexible strategists, who have the ability to use both strategies of wayfinding  
265 and should therefore be superior navigators and compared their odds ratios to the undetermined  
266 strategists and the orientation strategists (Table 3).

267 ~~~~~ TABLE 3 ABOUT HERE (separate file) ~~~~~

268 Comparing the flexible strategy to the undetermined strategy, a flexible strategist had greater  
269 odds of being male, having a high education level, and being older in age (in reference to the  
270 youngest age group of 18-35). Comparing the flexible strategy to the orientation strategy, a  
271 flexible strategist had greater odds of being male, having a high education level, and living in  
272 a lower-density urban area with 100,000 up to 500,000 inhabitants per region. Men were more  
273 likely to use a flexible strategy than an undetermined strategy compared to women but did not  
274 have significantly higher odds of being a flexible vs. an orientation strategist. Persons in the  
275 age group 36-55 yrs. and 71-96 yrs. had significantly greater odds of being a flexible strategist  
276 than being an undetermined strategist. However, the age group 71-96 did not have greater odds  
277 of being a flexible strategist compared to an orientation strategist.

278 In summary, older males, with a higher education and living in less urbanized areas tended to  
279 report using both the orientation and the route strategy, although gender and age effects were

280 similar between the flexible strategy as well as the orientation strategy. In addition, the  
281 presence of vertigo, and being in the youngest age group (18-35 years) also reduced the odds  
282 of using a flexible strategy for wayfinding.

## 283 **Discussion**

284 Using the wayfinding strategy scale, we examined how sociodemographic measures influence  
285 whether a person tends to follow a route or develop a map of the environment. Persons living  
286 in less urban regions, having higher education, being male or over the age of 35 were more  
287 likely to report using a map-based wayfinding strategy (the orientation strategy). Being younger,  
288 being female or living in more urban areas were indicative of lower scores in the orientation  
289 strategy. The presence of vertigo/dizziness in the last 12 months decreased scores for both  
290 wayfinding strategies, implying that vestibular problems impair general wayfinding ability. To  
291 look at combined effects across wayfinding strategies, we grouped persons with high scores in  
292 both strategies as flexible strategists and persons with low scores in both strategies as  
293 undetermined strategists. Individuals tended to use both strategies if they were over 35 years  
294 old, well-educated and living in less urban areas. Our results provide new insights into how  
295 environment, education and behavior affect how humans navigate across an entire adult lifespan.

296 One of the factors that most consistently affects wayfinding is gender. The fact that men report  
297 higher orientation strategy scores than women has been shown in young adults [5,11,29]; we  
298 demonstrate the same trend across all age groups. Men also have higher scores for both the  
299 route and orientation strategy, suggesting they can flexibly choose what navigation strategy to  
300 use. This may explain the overall and a task-related advantage in navigational ability in real and  
301 simulated environments, albeit in only about half of the cases (49.28%) [23]. Gender differences  
302 already exist in childhood, but it is not clear to what extent biological and sex-typed experiential  
303 factors interact [10,55–57] to produce this effect and if they are consistent throughout lifetime  
304 [9].

305 Because we measured a large range of ages, we were able to show that age had a large effect  
306 on wayfinding scores. Older participants showed a stronger reliance on orientation strategy and  
307 overall higher scores than younger participants. In the original Wayfinding Scale study, older  
308 participants also tended to report using the orientation strategy, which was attributed to a  
309 growing experience in older persons [5]. Most of their participants, however, were between the  
310 ages of 18-35, which encompasses our youngest age group. The high scores reported by the  
311 oldest age group in our study represent novel findings, that are not entirely consistent with the  
312 literature. Behavioral experiments on real or virtual navigation report that older persons have  
313 difficulties switching between strategies [58], forming and using a cognitive map [47] and that  
314 they prefer an egocentric strategy [47] for navigation, such as the route strategy. Other studies  
315 have shown spatial memory deficits among older persons in mental rotation tests [4], and virtual  
316 learning/wayfinding performances, typically measured by errors, distance and/or speed  
317 [48,49,59]. Navigational self-reports from older participants tend to inflate their actual  
318 navigational ability [49] (but see [50]), suggesting that the high scores in the oldest age groups  
319 in our study may result from inaccurate reporting. However, the age group 36-55 was more  
320 likely to flexibly use both strategies than the youngest age group, and we would not expect the  
321 reporting biases to already be present here. Future studies that examine self-reported  
322 wayfinding preferences and behavior within the same individual would disentangle these  
323 effects.

324 In general, the average scores for both wayfinding strategies were higher across our sample  
325 than in previous studies. Although this could suggest a general increase in reporting over time,  
326 we attribute it to the greater age diversity in our sample, in particular the higher number of older  
327 participants. Previous studies have used smaller sample sizes or narrower age ranges  
328 [5,10,11,29,53], therefore, we believe the higher scores are more representative of wayfinding  
329 across the population.

330 The strongest positive influence on wayfinding ability comes from education. This could simply  
331 be a result of a self-report education bias, where participants with higher education had a better  
332 self-assessment [51]. However, behavioral research on visuospatial attention and cognition  
333 demonstrate a relationship between higher education and better spatial ability [52,55]. Higher  
334 education monotonically increases the probability of a person using the orientation strategy and  
335 is indicative of a person being a flexible strategist. Whether the educational effect on  
336 wayfinding strategy is a result of improved spatial ability remains to be seen.

337 Participants living in urban areas reported lower scores on orientation strategy, emphasizing the  
338 idea that the geographical topography of the environment influences the wayfinding strategy  
339 used. Previous research has shown that both men and women are more likely to use cardinal  
340 directions when giving directions if they came from places laid out in a grid-like pattern [53].  
341 In cities, the omnipresence of signs and buildings makes it impossible or unnecessary to  
342 orientate via distances and cardinal directions as in the orientation strategy.

343 Previous studies have shown an age-gender interaction for the orientation strategy, where men  
344 show a greater increase in the orientation strategy scores with increasing age [5]. Here instead,  
345 we found an age-gender-interaction for route strategy, where younger persons, especially  
346 younger men, rely more on the route strategy than older persons. Recent work suggests that the  
347 use of mobile GPS devices for navigation activates less of the brain, in particular in the  
348 hippocampus, and area thought to be important for the orientation strategy [60] and also leads  
349 to increased errors in navigation [61]. This decrease in the use of the orientation strategy in  
350 young men could be the first population-based evidence of behavioral changes resulting from  
351 increased GPS usage, particularly in the younger generation. We are currently specifically  
352 examining the effect of GPS-use on the choice of wayfinding strategy.

353 Participants with vertigo or dizziness, even if they do not have a clear vestibular pathology,  
354 have a disadvantage in wayfinding. Similarly, patients with vestibular loss have difficulties in



355 spatial memory [62–65] and wayfinding tasks [3,19,20] as well as reduced hippocampal volume.  
356 The hippocampus is thought to be important for the allocentric navigation [9,67] that forms the  
357 basis of the orientation strategy. However, participants with vertigo had low scores on both the  
358 orientation and the route strategy, which cannot totally confirm the connection between  
359 vestibular dysfunction, allocentric navigation and the hippocampus. Our results emphasizes that  
360 vestibular input is an important source of information for spatial memory and efficient  
361 wayfinding [17,66] for both wayfinding strategies, and supports the theory that vertigo and  
362 dizziness has a more generalized effect on cognition [18], more than a specific effect on spatial  
363 memory. We are aware that we included a broad definition of vertigo/dizziness. However, the  
364 vertigo symptoms were assessed by standardized questions derived from previous studies [54]  
365 and the prevalence of vertigo corresponded to recent findings [26].

366 Similar to previous studies using the Wayfinding Scale, the route strategy showed higher scores  
367 overall than the orientation strategy, emphasizing the idea that route strategy is less  
368 computationally expensive, and therefore less challenging than orientation strategy [5,11,28,67].  
369 To examine the ability to switch between different strategies we grouped our sample into four  
370 groups, the predominant orientation strategist, the route strategists and our two novel groups,  
371 the flexible strategists that use both strategies, and undetermined strategists that do not appear  
372 to use either strategy. Males with a high education and living in more rural areas are more likely  
373 to flexibly use both strategies, in line with behavioral evidence for a male and educational  
374 advantage in spatial abilities [52]. Having vertigo and being in the youngest age group was  
375 indicative of not using either strategy, confirming the effect vestibular dysfunction and GPS  
376 use on general navigational ability.

## 377 **Conclusion**

378 Our study is the first to show the strong influence of all sociodemographic factors except  
379 income in the choice of wayfinding strategy in a representative sample of the population. We

380 specifically demonstrate the detrimental effect of vertigo and dizziness on wayfinding ability,  
381 and a potential change in the way persons (especially young persons) navigate, as a result of  
382 the increased use of mobile GPS devices. Plausible mechanisms for these effects may involve  
383 orientation-specific brain areas and effects of vestibular input on cognition [3,19,20]. The  
384 scores acquired can be used for comparisons in future studies with smaller sample sizes.  
385 Longitudinal studies and experiments involving specific navigational paradigms are needed to  
386 understand the underlying mechanisms for the sociodemographic effects found here.

## References

1. Harris MA, Wiener JM, Wolbers T. Aging specifically impairs switching to an allocentric navigational strategy. *Front Aging Neurosci.* 2012;4:29. doi: 10.3389/fnagi.2012.00029. PubMed PMID: 23125833.
2. Harris MA, Wolbers T. Ageing effects on path integration and landmark navigation. *Hippocampus.* 2012;22(8):1770–80. doi: 10.1002/hipo.22011. PubMed PMID: 22431367.
3. Brandt T, Schautzer F, Hamilton DA, Brüning R, Markowitsch HJ, Kalla R, et al. Vestibular loss causes hippocampal atrophy and impaired spatial memory in humans. *Brain.* 2005;128(Pt 11):2732–41. doi: 10.1093/brain/awh617. PubMed PMID: 16141283.
4. Previc FH, Krueger WW, Ross RA, Roman MA, Siegel G. The relationship between vestibular function and topographical memory in older adults. *Front Integr Neurosci.* 2014;8:46. doi: 10.3389/fnint.2014.00046. PubMed PMID: 24917795.
5. Lawton CA. Gender differences in way-finding strategies: Relationship to spatial ability and spatial anxiety. *Sex Roles.* 1994;30(11-12):765–79. doi: 10.1007/bf01544230.
6. Siegel AW, White SH. The development of spatial representations of large-scale environments. *Adv Child Dev Behav.* 1975;10:9–55. PubMed PMID: 1101663.
7. Pétervári J, Danek AH, Flanagan VL. Wayfinding and restructuring in a novel city: An insight problem solving task; 2015.
8. Meilinger T, Knauff M, Bühlhoff HH. Working memory in wayfinding—a dual task experiment in a virtual city. *Cogn Sci.* 2008;32(4):755–70. doi: 10.1080/03640210802067004. PubMed PMID: 21635352.
9. Wolbers T, Hegarty M. What determines our navigational abilities? *Trends Cogn Sci (Regul Ed).* 2010;14(3):138–46. doi: 10.1016/j.tics.2010.01.001. PubMed PMID: 20138795.
10. Lawton CA, Kallai J. Gender Differences in Wayfinding Strategies and Anxiety About Wayfinding: A Cross-Cultural Comparison. *Sex Roles.* 2002;47(9/10):389–401. doi: 10.1023/A:1021668724970.
11. Hund AM, Minarik JL. Getting From Here to There: Spatial Anxiety, Wayfinding Strategies, Direction Type, and Wayfinding Efficiency. *Spatial Cognition & Computation.* 2006;6(3):179–201. doi: 10.1207/s15427633scc0603\_1.
12. Farr AC, Kleinschmidt T, Yarlagadda P, Mengersen K. Wayfinding: A simple concept, a complex process. *Transport Reviews.* 2012;32(6):715–43. doi: 10.1080/01441647.2012.712555.
13. Wiener JM, Condappa O de, Harris MA, Wolbers T. Maladaptive bias for extrahippocampal navigation strategies in aging humans. *J Neurosci.* 2013;33(14):6012–

7. doi: 10.1523/JNEUROSCI.0717-12.2013. PubMed PMID: 23554482.
14. Lawton CA. Strategies for indoor wayfinding: The role of orientation. *Journal of Environmental Psychology*. 1996;16(2):137–45. doi: 10.1006/jevp.1996.0011.
15. Du AT, Schuff N, Zhu XP, Jagust WJ, Miller BL, Reed BR, et al. Atrophy rates of entorhinal cortex in AD and normal aging. *Neurology*. 2003;60(3):481–6. PubMed PMID: 12578931.
16. Burgess N, Maguire EA, O'Keefe J. The human hippocampus and spatial and episodic memory. *Neuron*. 2002;35(4):625–41. PubMed PMID: 12194864.
17. Kessels RP, Haan EH de, Kappelle LJ, Postma A. Varieties of human spatial memory: a meta-analysis on the effects of hippocampal lesions. *Brain Res Brain Res Rev*. 2001;35(3):295–303. PubMed PMID: 11423159.
18. Semenov YR, Bigelow RT, Xue Q-L, Du Lac S, Agrawal Y. Association Between Vestibular and Cognitive Function in U.S. Adults: Data From the National Health and Nutrition Examination Survey. *J Gerontol A Biol Sci Med Sci*. 2016;71(2):243–50. doi: 10.1093/gerona/glv069. PubMed PMID: 26219850.
19. Hübner K, Hamilton DA, Kalla R, Stephan T, Glasauer S, Ma J, et al. Spatial memory and hippocampal volume in humans with unilateral vestibular deafferentation. *Hippocampus*. 2007;17(6):471–85. doi: 10.1002/hipo.20283. PubMed PMID: 17397043.
20. Kremmyda O, Hübner K, Flanagan VL, Hamilton DA, Linn J, Strupp M, et al. Beyond Dizziness: Virtual Navigation, Spatial Anxiety and Hippocampal Volume in Bilateral Vestibulopathy. *Front Hum Neurosci*. 2016;10:139. doi: 10.3389/fnhum.2016.00139. PubMed PMID: 27065838.
21. Popp P, Wulff M, Finke K, Rühl M, Brandt T, Dieterich M. Cognitive deficits in patients with a chronic vestibular failure. *J Neurol*. 2017;264(3):554–63. doi: 10.1007/s00415-016-8386-7. PubMed PMID: 28074268.
22. Smith PF. The vestibular system and cognition. *Curr Opin Neurol*. 2017;30(1):84–9. doi: 10.1097/WCO.0000000000000403. PubMed PMID: 27845944.
23. Coluccia E, Louse G. Gender differences in spatial orientation: A review. *Journal of Environmental Psychology*. 2004;24(3):329–40. doi: 10.1016/j.jenvp.2004.08.006.
24. Heckel C, Hofmann O. Das ADM-Stichproben-System (F2F) ab 1997. In: *Stichproben-Verfahren in der Umfrageforschung: Eine Darstellung für die Praxis*. 2nd ed. Wiesbaden: Springer VS; 2014. p. 85–116.
25. Neuhauser HK, Brevern M von, Radtke A, Lezius F, Feldmann M, Ziese T, et al. Epidemiology of vestibular vertigo: a neurologic survey of the general population. *Neurology*. 2005;65(6):898–904. doi: 10.1212/01.wnl.0000175987.59991.3d. PubMed PMID: 16186531.
26. Neuhauser HK. Epidemiology of dizziness and vertigo. *Nervenarzt*. 2009;80(8):887–94. doi: 10.1007/s00115-009-2738-9. PubMed PMID: 19626307.
27. Beaton DE, Bombardier C, Guillemin F, Ferraz MB. Guidelines for the process of cross-cultural adaptation of self-report measures. *Spine (Phila Pa 1976)*. 2000;25(24):3186–91. PubMed PMID: 11124735.
28. Prestopnik JL, Roskos-Ewoldsen B. The relation among wayfinding strategy use, sense of direction, sex, familiarity and wayfinding ability. *Journal of Environmental Psychology*. 2000;20(2):177–91. doi: 10.1006/jevp.1999.0160.
29. Charleston S. The International Wayfinding Strategy Scale: evidence for cross-cultural use with a sample from the UK. *Percept Mot Skills*. 2008;106(3):881–2. doi: 10.2466/pms.106.3.881-882. PubMed PMID: 18712210.
30. Burger HG. Hormonal changes and biomarkers in late reproductive age, menopausal transition and menopause. *Best Pract Res Clin Obstet Gynaecol*. 2009;23(1):7–23. doi: 10.1016/j.bpobgyn.2008.10.001. PubMed PMID: 19046657.
31. Allan CA, McLachlan RI. Age-related changes in testosterone and the role of replacement therapy in older men. *Clin Endocrinol (Oxf)*. 2004;60(6):653–70.

- doi: 10.1111/j.1365-2265.2004.02002.x. PubMed PMID: 15163327.
32. Statistik und Wissenschaft. Demographische Standards.: Eine gemeinsame Empfehlung des ADM Arbeitskreis Deutscher Markt- und Sozialforschungsinstitute e. V., der Arbeitsgemeinschaft Sozialwissenschaftlicher Institute e. V. (ASI) und des Statistischen Bundesamtes. 5th ed. 17. Wiesbaden; 2010. Available from: [www.destatis.de](http://www.destatis.de).
  33. Schneider SL. Die Konzeptualisierung, Erhebung und Kodierung von Bildung in nationalen und internationalen Umfragen; 2015 [cited 2016 Apr 30]. ger.
  34. Aschpurwis + Behrens. BIK-Regionen 2010. Regionstypen/ Regionsklassen/ Strukturtypen 2000-2010. Available from: [http://www.bik-gmbh.de/texte/Methode\\_BIKRegionen802.pdf](http://www.bik-gmbh.de/texte/Methode_BIKRegionen802.pdf).
  35. Aschpurwis + Behrens. BIK Regionen: Ballungsräume, Stadtregionen Mittel-/Unterzentrengebiete. Methodenbeschreibung zur Aktualisierung 2000. Available from: <http://www.bik-gmbh.de/produkte/regionen/index.html>.
  36. Hoffmeyer-Zlotnik JHP, Warner U, editors. Harmonising demographic and socio-economic variables for cross-national comparative survey research. Dordrecht: Springer; 2014. 274 p.
  37. Stichproben-Verfahren in der Umfrageforschung: Eine Darstellung für die Praxis. 2nd ed. Wiesbaden: Springer VS; 2014. 310 p.
  38. Baltés-Götz B. Lineare Regressionsanalyse mit SPSS: Universität Trier.
  39. Backhaus K, Erichson B, Plinke W, Weiber R. Multivariate Analysemethoden: Eine anwendungsorientierte Einführung. 14th ed. Berlin, Heidelberg: Springer Gabler; 2016. 647 p.
  40. Janssen J, Laatz W. Statistische Datenanalyse mit SPSS: Eine anwendungsorientierte Einführung in das Basissystem und das Modul Exakte Tests. 8th ed. Berlin, Heidelberg: Springer; 2013. 804 p. ger.
  41. Field A. Discovering statistics using SPSS: (and sex and drugs and rock 'n' roll). 3rd ed. Los Angeles, Calif.: Sage; 2011. 821 p.
  42. Long JS, Ervin LH. Using Heteroscedasticity Consistent Standard Errors in the Linear Regression Model. *The American Statistician*. 2000;54(3):217. doi: 10.2307/2685594.
  43. Schendera CFG. Regressionsanalyse mit SPSS. München: Oldenbourg; 2008. 466 p. ger.
  44. Cohen R. Extension Bundles from IBM SPSS. [cited 2016 Jun 29]. Available from: Cohen, R. (2015). Extension Bundles from IBM SPSS. Online-Dokument (abgerufen: 01.12.2015): <https://www.ibm.com/developerworks/community/files/form/anonymous/api/library/b5bb8a42-04d2-4503-93bb-dc45d7a145c2/document/1d445b76-d706-44a6-85bf-9e3738d223a4/media/Extension%20Bundles%20from%20IBM%20SPSS.pdf>.
  45. R Core Team. R: A language and environment for statistical computing: R Foundation for Statistical Computing. Available from: <http://www.R-project.org/>.
  46. Burkitt J, Widman D, Saucier DM. Evidence for the influence of testosterone in the performance of spatial navigation in a virtual water maze in women but not in men. *Horm Behav*. 2007;51(5):649–54. doi: 10.1016/j.yhbeh.2007.03.007. PubMed PMID: 17462646.
  47. Moffat SD. Aging and spatial navigation: what do we know and where do we go? *Neuropsychol Rev*. 2009;19(4):478–89. doi: 10.1007/s11065-009-9120-3. PubMed PMID: 19936933.
  48. Moffat S. Age differences in spatial memory in a virtual environment navigation task. *Neurobiology of Aging*. 2001;22(5):787–96. doi: 10.1016/S0197-4580(01)00251-2.
  49. Taillade M, N'Kaoua B, Sauzéon H. Age-Related Differences and Cognitive Correlates of Self-Reported and Direct Navigation Performance: The Effect of Real and Virtual Test Conditions Manipulation. *Front Psychol*. 2015;6:2034. doi: 10.3389/fpsyg.2015.02034. PubMed PMID: 26834666.

50. Rooij NK de, Claessen MHG, van der Ham IJM, Post MWM, Visser-Meily JMA. The Wayfinding Questionnaire: A clinically useful self-report instrument to identify navigation complaints in stroke patients. *Neuropsychol Rehabil.* 2017;1–20. doi: 10.1080/09602011.2017.1347098. PubMed PMID: 28720024.
51. Dunning D, Heath C, Suls JM. Flawed Self-Assessment: Implications for Health, Education, and the Workplace. *Psychol Sci Public Interest.* 2004;5(3):69–106. doi: 10.1111/j.1529-1006.2004.00018.x. PubMed PMID: 26158995.
52. Proust-Lima C, Amieva H, Letenneur L, Orgogozo J-M, Jacqmin-Gadda H, Dartigues J-F. Gender and education impact on brain aging: a general cognitive factor approach. *Psychol Aging.* 2008;23(3):608–20. doi: 10.1037/a0012838. PubMed PMID: 18808250.
53. Lawton CA. Gender and Regional Differences in Spatial Referents Used in Direction Giving. *Sex Roles.* 2001;44(5/6):321–37. doi: 10.1023/A:1010981616842.
54. Grill E, Strupp M, Muller M, Jahn K. Health services utilization of patients with vertigo in primary care: a retrospective cohort study. *J Neurol.* 2014;261(8):1492–8. doi: 10.1007/s00415-014-7367-y. PubMed PMID: 24817192.
55. Linn MC, Petersen AC. Emergence and Characterization of Sex Differences in Spatial Ability: A Meta-Analysis. *Child Development.* 1985;56(6):1479. doi: 10.2307/1130467.
56. Schmitz S. Gender-related strategies in environmental development: effects of anxiety on wayfinding in and representation of a three-dimensional maze. *Journal of Environmental Psychology.* 1997;17(3):215–28. doi: 10.1006/jev.1997.0056.
57. Schmitz S. Gender Differences in Acquisition of Environmental Knowledge Related to Wayfinding Behavior, Spatial Anxiety and Self-Estimated Environmental Competencies. *Sex Roles.* 1999;41(1/2):71–93. doi: 10.1023/a:1018837808724.
58. Li R, Singh M. Sex differences in cognitive impairment and Alzheimer's disease. *Sex Differences in Neurological and Psychiatric Disorders.* 2014;35(3):385–403. doi: 10.1016/j.yfrne.2014.01.002.
59. Head D, Isom M. Age effects on wayfinding and route learning skills. *Behavioural Brain Research.* 2010;209(1):49–58. doi: 10.1016/j.bbr.2010.01.012.
60. Javadi A-H, Emo B, Howard LR, Zisch FE, Yu Y, Knight R, et al. Hippocampal and prefrontal processing of network topology to simulate the future. *Nat Commun.* 2017;8:14652. doi: 10.1038/ncomms14652. PubMed PMID: 28323817.
61. Ishikawa T, Fujiwara H, Imai O, Okabe A. Wayfinding with a GPS-based mobile navigation system: A comparison with maps and direct experience. *Journal of Environmental Psychology.* 2008;28(1):74–82. doi: 10.1016/j.jenvp.2007.09.002.
62. Spiers HJ. Unilateral temporal lobectomy patients show lateralized topographical and episodic memory deficits in a virtual town. *Brain.* 2001;124(12):2476–89. doi: 10.1093/brain/124.12.2476.
63. Vass LK, Epstein RA. Abstract representations of location and facing direction in the human brain. *J Neurosci.* 2013;33(14):6133–42. doi: 10.1523/JNEUROSCI.3873-12.2013. PubMed PMID: 23554494.
64. Manns JR, Hopkins RO, Reed JM, Kitchener EG, Squire LR. Recognition memory and the human hippocampus. *Neuron.* 2003;37(1):171–80. PubMed PMID: 12526782.
65. Manns JR, Hopkins RO, Squire LR. Semantic Memory and the Human Hippocampus. *Neuron.* 2003;38(1):127–33. doi: 10.1016/S0896-6273(03)00146-6.
66. Previc FH. Vestibular loss as a contributor to Alzheimer's disease. *Med Hypotheses.* 2013;80(4):360–7. doi: 10.1016/j.mehy.2012.12.023. PubMed PMID: 23375669.
67. Lawton CA, Morrin KA. Gender Differences in Pointing Accuracy in Computer-Simulated 3D Mazes. *Sex Roles.* 1999;40(1):73–92. doi: 10.1023/A:1018830401088.

## Figure and table legends:

If not already within the text

**Table 2. Results of the multiple regression for each strategy separately (n = 783).** Beta-coefficients ( $\beta$ ), Confidence Intervals and p-values for the regression coefficients for orientation strategy and route strategy (with heteroscedasticity-robust standard errors – see Methods), and individually weighted according to frequency of the current population.

**Table 3. The odds of being a flexible strategist (n = 783).** Odds ratios (OR), Confidence Intervals (CI) and p-values (p) from the multinomial regression model for the odds of flexible vs. undetermined and flexible vs. orientation strategies. Outcomes were individually weighted according to frequency distribution of the current population. OR >1 means it is more likely to be part of the group of interest.

## Supporting information

**S1 File.** The wayfinding strategy scale as used in the questionnaire

**S2 Table.** Alternative linear regression models, including lin-log regression and age in yrs. (metric)

**S3 Table.** Multinomial linear regression models for all possible odds concerning the undetermined, route, orientation, and flexible strategy.

**Data availability.** Data for all studies are available at <https://web.gin.g-node.org/>.

**Code availability.** SPSS Syntax-file is available at <https://web.gin.g-node.org/>. The file includes preparation and all relevant analysis for this paper.
